# Supplementary material for: DUSP12 regulates the tumorigenesis and prognosis of hepatocellular carcinoma
Source: PeerJ. 2021 Aug 3;9:e11929. doi: 10.7717/peerj.11929 (PMC8344690; doi:10.7717/peerj.11929)
Supplement: Supplemental Information 2 — The top positively correlated genes in TCGA dataset for DUSP12 (Pearson correlation coefficient > = 0.3). [file peerj-09-11929-s002.xls]

## Sheet: Table S1
Genes	PearsonCC
YY1AP1	0.81
C1orf77	0.81
ILF2	0.8
DHX9	0.8
PRCC	0.79
ISG20L2	0.77
UBAP2L	0.77
GON4L	0.76
BAT2L2	0.75
TPM3	0.75
USP21	0.75
RBM8A	0.75
POGK	0.75
PIGC	0.74
POLR3C	0.74
SFRS3	0.74
B4GALT3	0.74
STX6	0.73
PI4KB	0.73
DENND4B	0.73
SNAPIN	0.73
SFRS1	0.73
PYGO2	0.72
DEDD	0.72
SFRS7	0.72
RBMX	0.72
IPO9	0.71
MPZL1	0.71
SFRS2	0.71
HDGF	0.71
HNRNPM	0.71
ACBD6	0.71
METTL13	0.71
HNRNPA3	0.71
SRRT	0.7
KIAA1731	0.7
HNRNPC	0.7
C1orf156	0.7
SMPD4	0.7
PIP5K1A	0.7
EWSR1	0.7
GATAD2B	0.7
RBM12	0.69
TUFT1	0.69
TCERG1	0.69
TIPRL	0.69
TRMT6	0.69
POLR3F	0.69
KIAA0907	0.69
VPS45	0.69
FUS	0.68
TPR	0.68
CLK2	0.68
MSH2	0.68
SF1	0.68
THUMPD2	0.68
ZC3H11A	0.68
MTA3	0.68
TRA2B	0.68
MRPL9	0.68
NCOA5	0.68
BUD13	0.68
TSEN15	0.68
USP39	0.68
HNRNPU	0.68
TMEM183A	0.68
HNRNPL	0.68
USF1	0.68
DBR1	0.68
CENPL	0.67
CWC22	0.67
NCL	0.67
RIT1	0.67
SUV39H2	0.67
RABIF	0.67
HNRNPD	0.67
ZNF142	0.67
NUP107	0.67
VPS72	0.67
MATR3	0.67
EED	0.67
NOP58	0.67
TMEM79	0.67
NIF3L1	0.67
RBM39	0.67
INTS3	0.67
COPS7B	0.67
RUSC1	0.67
DPF2	0.67
CBX1	0.67
HNRNPA2B1	0.67
GPATCH4	0.67
PWP1	0.67
CBX3	0.67
SNRPG	0.67
CPSF6	0.67
ZNF207	0.67
ZNF202	0.67
DDX42	0.67
TROVE2	0.67
GMPS	0.67
CCT3	0.66
SFPQ	0.66
PPHLN1	0.66
DHX57	0.66
NUF2	0.66
SMG7	0.66
FAM71D	0.66
UCK2	0.66
PIAS3	0.66
COIL	0.66
ANAPC7	0.66
MFF	0.66
GPBP1	0.66
PIGM	0.66
WDR75	0.66
CDC42SE1	0.66
CACYBP	0.66
SSRP1	0.66
UBE2T	0.66
UFC1	0.66
UBE2Q1	0.66
C12orf41	0.66
RFWD3	0.66
MDM4	0.66
C12orf32	0.66
ERCC3	0.66
HNRPDL	0.66
PEA15	0.66
SF3B4	0.66
NRF1	0.66
SSR2	0.66
C20orf72	0.66
ABL2	0.66
YOD1	0.66
BCL9	0.66
LASS5	0.66
NME7	0.66
MCM6	0.66
MITD1	0.66
FAM189B	0.66
SLC39A1	0.66
MRPS14	0.66
ILF3	0.66
RPA1	0.66
UBE2E1	0.66
HNRNPH1	0.65
SNRPB2	0.65
NCBP2	0.65
C17orf42	0.65
CKAP5	0.65
MORC2	0.65
U2AF2	0.65
PRDM4	0.65
MRE11A	0.65
SUPT16H	0.65
RFWD2	0.65
ZNF574	0.65
XPO1	0.65
KDM5B	0.65
RBM14	0.65
SENP1	0.65
SNRPE	0.65
ANKLE2	0.65
SSB	0.65
BLZF1	0.65
CHEK1	0.65
HSPA14	0.65
HNRNPA3P1	0.65
TCOF1	0.65
CCDC59	0.65
SART3	0.65
BMS1	0.65
ACTL6A	0.65
CRTC2	0.65
MAPKAPK5	0.65
GRPEL2	0.64
ALS2CR4	0.64
DDX50	0.64
HAUS3	0.64
2021-03-07	0.64
RFC4	0.64
ZNF133	0.64
LIG1	0.64
SNRNP200	0.64
ANKRD32	0.64
UBE2D2	0.64
POLD1	0.64
RAE1	0.64
CCDC99	0.64
SFRS8	0.64
BUB1	0.64
PTBP1	0.64
HEATR1	0.64
ZFP64	0.64
IFT52	0.64
NUP37	0.64
ARL6IP6	0.64
RAD1	0.64
NAA40	0.64
HAT1	0.64
HJURP	0.64
NVL	0.64
PPWD1	0.64
TARDBP	0.64
CSNK2A1	0.64
DDX20	0.64
POLA1	0.64
MED17	0.64
ZNF638	0.64
PRIM2	0.64
HINFP	0.64
TOP2B	0.64
TOPBP1	0.64
FARSB	0.64
RPIA	0.64
METAP2	0.64
RNF34	0.64
C3orf17	0.64
GPN1	0.64
OLA1	0.64
YTHDF1	0.64
EP400	0.64
NUP35	0.64
CWC27	0.64
RNF115	0.64
MTBP	0.64
CRNKL1	0.63
ZNF687	0.63
LMNB1	0.63
GTF3C2	0.63
PTMA	0.63
FUBP1	0.63
EXOSC3	0.63
TEX10	0.63
RBM34	0.63
THOC1	0.63
ZNF526	0.63
USP34	0.63
ILKAP	0.63
CCDC66	0.63
MCRS1	0.63
MOBKL3	0.63
TDG	0.63
KHDRBS1	0.63
YWHAQ	0.63
POGZ	0.63
NCAPD3	0.63
LUC7L3	0.63
C21orf45	0.63
BRAP	0.63
ACIN1	0.63
UBE2N	0.63
TTC13	0.63
HNRNPK	0.63
TRIM11	0.63
ADNP	0.63
PMS1	0.63
SMG5	0.63
UBA2	0.63
E2F6	0.63
RIOK1	0.63
CBFA2T2	0.63
BRPF1	0.63
DENR	0.63
MTMR2	0.63
RNF214	0.63
WHSC1	0.63
SET	0.63
NCSTN	0.63
ISY1	0.63
SUPT7L	0.63
USP1	0.63
DAZAP1	0.63
HNRNPA0	0.63
CEBPZ	0.63
GMEB2	0.63
TMCO1	0.63
SGOL2	0.63
BRIX1	0.62
NAT10	0.62
PRPF3	0.62
SFRS6	0.62
DNAJC9	0.62
SKIV2L2	0.62
RAB28	0.62
MTX2	0.62
SMARCD1	0.62
POLR2D	0.62
ZNF461	0.62
SAP130	0.62
RBM22	0.62
C10orf18	0.62
WAC	0.62
RAB35	0.62
ASH1L	0.62
PPOX	0.62
ASXL1	0.62
ZNF620	0.62
POLD3	0.62
TUG1	0.62
NUP214	0.62
MCM3	0.62
RNASEN	0.62
KIAA0406	0.62
SPATS2	0.62
DDX55	0.62
HTRA2	0.62
KIF20A	0.62
GPR89A	0.62
ZBTB49	0.62
RBM10	0.62
CCAR1	0.62
SCAMP3	0.62
GEMIN5	0.62
POLG2	0.62
COMMD2	0.62
LARS	0.62
DCLRE1B	0.62
PDCD7	0.62
ADO	0.62
SMARCE1	0.62
LRRC37B2	0.62
DHX15	0.62
NXF1	0.62
RPRD2	0.62
SMARCAL1	0.62
SCYL3	0.62
GORAB	0.62
KIN	0.62
TLK2	0.62
UBAP2	0.62
DDX27	0.62
POC5	0.62
ARHGEF11	0.62
CDC73	0.62
ZFR	0.62
NUP62	0.62
H2AFY	0.62
ZNF530	0.62
RBM15B	0.62
NOL10	0.62
DAP3	0.62
RBM12B	0.62
DDX23	0.62
MCM2	0.62
CNOT3	0.62
ZNF473	0.62
FEN1	0.62
DBF4B	0.62
CENPF	0.62
MSH6	0.62
MAPRE1	0.62
HNRPLL	0.62
RIC8A	0.62
ANAPC1	0.62
C10orf119	0.62
SR140	0.62
DNM1L	0.62
ZBED5	0.62
HNRNPH3	0.62
C10orf78	0.62
GGNBP2	0.62
CHD8	0.61
STK25	0.61
CEP350	0.61
UIMC1	0.61
ADAR	0.61
MED15	0.61
SLC4A1AP	0.61
KIAA1328	0.61
RSRC2	0.61
WDSUB1	0.61
C20orf4	0.61
NIPBL	0.61
THEM4	0.61
TTC27	0.61
WDR53	0.61
DNTTIP2	0.61
UBQLN4	0.61
ZNF343	0.61
TIGD1	0.61
FANCF	0.61
IQCB1	0.61
HDAC2	0.61
TRIP4	0.61
CCT4	0.61
ZNF384	0.61
PPP5C	0.61
ZNF567	0.61
CENPK	0.61
ZNF2	0.61
RYK	0.61
SMARCC1	0.61
COPA	0.61
XRCC6	0.61
MYNN	0.61
AEBP2	0.61
C7orf36	0.61
UBA3	0.61
C1orf52	0.61
SUMO2	0.61
QTRTD1	0.61
LYSMD1	0.61
YTHDC1	0.61
CCT8	0.61
C18orf21	0.61
DDX47	0.61
YEATS2	0.61
DHX30	0.61
ASB3	0.61
DCAF16	0.61
KDM3B	0.61
PHF5A	0.61
C2orf29	0.61
HAUS5	0.61
LARP4B	0.61
FBXO11	0.61
C2orf44	0.61
ANKRD49	0.61
C13orf34	0.61
ZNF512	0.61
CAND1	0.61
MED12	0.61
PEX11B	0.61
VPS54	0.61
XRCC5	0.61
UHRF2	0.61
NPAT	0.61
SLBP	0.61
REV1	0.61
DDX46	0.61
WHSC2	0.61
THOC3	0.61
FIP1L1	0.61
NAA25	0.61
UBXN2A	0.61
FAM193A	0.61
SENP3	0.61
EIF2B1	0.61
DARS2	0.61
STT3A	0.61
ZCCHC3	0.61
MDM1	0.61
TXNDC9	0.61
TPX2	0.61
TMEM39A	0.61
ANP32E	0.61
GINS1	0.61
ABI2	0.61
RG9MTD3	0.61
ECT2	0.61
KCMF1	0.61
EIF1AD	0.61
ZNF639	0.61
SNRPD1	0.61
HNRNPUL1	0.61
NEDD1	0.61
MTPAP	0.61
ZBTB9	0.61
KIAA1310	0.61
PHF21A	0.61
ZBTB12	0.6
PHF20	0.6
SUZ12P	0.6
NUP85	0.6
ATXN7L3	0.6
LOC493754	0.6
RBBP7	0.6
HCG18	0.6
SAFB	0.6
LBR	0.6
SMYD5	0.6
C5orf54	0.6
NUP160	0.6
BAZ2A	0.6
EIF2S2	0.6
SAAL1	0.6
MSTO1	0.6
TAF3	0.6
NUP205	0.6
PGS1	0.6
SMNDC1	0.6
CKS1B	0.6
ZNF234	0.6
TAF4	0.6
PARP1	0.6
PHIP	0.6
BPTF	0.6
FNBP4	0.6
RRM1	0.6
GSK3A	0.6
HCFC1	0.6
CUL3	0.6
SNW1	0.6
RPRD1A	0.6
CDC23	0.6
ZNF335	0.6
C3orf63	0.6
SH3BP5L	0.6
METTL4	0.6
CASP2	0.6
RPS6KC1	0.6
RNF44	0.6
UTP20	0.6
PRKRA	0.6
SMC3	0.6
KIF2A	0.6
NFRKB	0.6
PWWP2A	0.6
C1orf9	0.6
IARS	0.6
ZNF143	0.6
C11orf84	0.6
C14orf106	0.6
MLL	0.6
NXT1	0.6
CCDC93	0.6
RAN	0.6
TULP3	0.6
ATIC	0.6
C2CD3	0.6
NUP133	0.6
TFCP2	0.6
PSPC1	0.6
ZNF248	0.6
YARS2	0.6
KIFC1	0.6
ZNF543	0.6
RPAP3	0.6
DDX52	0.6
SOAT1	0.6
GPATCH1	0.6
SNX27	0.6
APH1A	0.6
C12orf4	0.6
BUB3	0.6
SP3	0.6
DVL2	0.6
CCDC45	0.6
WDHD1	0.6
NOL8	0.6
RBM17	0.6
GPATCH2	0.6
MGC57346	0.6
MTF2	0.6
METTL6	0.6
METT11D1	0.6
PPM1G	0.6
ZNF765	0.6
PCID2	0.6
DCAF7	0.6
ZNF195	0.6
ZFC3H1	0.6
TTF1	0.6
PLAGL2	0.6
KPNB1	0.6
CEP170	0.6
NOL11	0.6
GIGYF2	0.6
SF3B2	0.6
RUNDC1	0.6
ZNF74	0.6
STIP1	0.6
UTP6	0.6
TPRKB	0.6
R3HDM1	0.6
HNRNPA1L2	0.6
PLK1	0.6
GGA3	0.6
SMC4	0.6
PCNA	0.6
ZNF337	0.6
PSME3	0.6
CIAO1	0.59
SAFB2	0.59
HMGXB4	0.59
C11orf57	0.59
PCNP	0.59
CREB1	0.59
EZH2	0.59
ZNF397OS	0.59
ORC4L	0.59
CSE1L	0.59
ZNF766	0.59
ZNF71	0.59
VANGL1	0.59
CHAF1B	0.59
TSR1	0.59
ANP32B	0.59
ZNHIT6	0.59
GTF3C3	0.59
CCDC6	0.59
KIAA1841	0.59
PUM2	0.59
C10orf137	0.59
MORF4L1	0.59
ZC3H15	0.59
TAF1A	0.59
ZNF286A	0.59
INTS4	0.59
MKI67IP	0.59
ACTR8	0.59
KIAA0528	0.59
TIAL1	0.59
NCOA6	0.59
STK24	0.59
MCM4	0.59
PPP2CA	0.59
SPIN3	0.59
UBE2V1	0.59
GTPBP4	0.59
DHX35	0.59
SETD8	0.59
C11orf61	0.59
PDCL	0.59
SFRS9	0.59
PPRC1	0.59
UBE2Z	0.59
PRPF40B	0.59
ZW10	0.59
STK11IP	0.59
DVL3	0.59
C3orf38	0.59
ZNF586	0.59
MCM5	0.59
SMARCA4	0.59
ACTR3	0.59
SLTM	0.59
ZNF8	0.59
KIF18B	0.59
VPS37C	0.59
PRMT3	0.59
PNO1	0.59
BAT2	0.59
MCM8	0.59
C1orf43	0.59
SEC23B	0.59
FAM168B	0.59
TCF3	0.59
SNRPB	0.59
CCDC43	0.59
QRICH1	0.59
MUS81	0.59
ZNF84	0.59
ADSS	0.59
MBD1	0.59
FRMD8	0.59
SASS6	0.59
FANCI	0.59
KIF18A	0.59
QSER1	0.59
SAE1	0.59
CEP250	0.59
POLDIP3	0.59
DSTYK	0.59
IPO5	0.59
GTF2H1	0.59
DDX31	0.59
MAML1	0.59
PPPDE1	0.59
EDC3	0.59
PPP1CC	0.59
CAPRIN1	0.59
BUB1B	0.59
TMEM194A	0.59
SEMA4C	0.59
UNG	0.58
DCUN1D5	0.58
BTBD10	0.58
RBM4B	0.58
CCNB2	0.58
UNC50	0.58
PANK2	0.58
EHMT2	0.58
ARMC8	0.58
C17orf71	0.58
NUP50	0.58
TOX4	0.58
PTBP2	0.58
DSN1	0.58
STRN4	0.58
ROD1	0.58
KNTC1	0.58
HNRNPR	0.58
RACGAP1	0.58
HMGN4	0.58
PRPF39	0.58
ZNF565	0.58
CHD1L	0.58
LDB1	0.58
GCN1L1	0.58
AGFG1	0.58
SMARCB1	0.58
GABPB1	0.58
SPC25	0.58
PARL	0.58
TRPC4AP	0.58
GIT2	0.58
ZSWIM1	0.58
ATF7	0.58
TNRC18	0.58
ERH	0.58
PAPOLG	0.58
EIF4ENIF1	0.58
CEP192	0.58
MAP3K4	0.58
KTI12	0.58
KBTBD2	0.58
CWF19L2	0.58
PRKCI	0.58
USP37	0.58
CDC7	0.58
KLHL12	0.58
MEX3C	0.58
CNOT6	0.58
ATXN2	0.58
MAVS	0.58
MED7	0.58
ZNF26	0.58
GORASP2	0.58
RNF8	0.58
KIF20B	0.58
NSL1	0.58
METTL3	0.58
PNPT1	0.58
CDCA4	0.58
DDX18	0.58
MAD2L1	0.58
ZSCAN12	0.58
DGCR8	0.58
POLR1B	0.58
SLC41A1	0.58
EXO1	0.58
DNAJC14	0.58
TSG101	0.58
ANAPC5	0.58
UCHL5	0.58
TTC9C	0.58
IWS1	0.58
AMMECR1L	0.58
CAMSAP1L1	0.58
RNPS1	0.58
ADNP2	0.58
FANCG	0.58
MED20	0.58
UBE2E3	0.58
VPS26A	0.58
LOC144438	0.58
RCOR3	0.58
SPIN1	0.58
BTF3L4	0.58
ASPM	0.58
CDK5RAP1	0.58
ORC2L	0.58
HIATL1	0.58
FUNDC1	0.58
C5orf42	0.58
ATXN10	0.58
SIP1	0.58
TJAP1	0.58
XRN2	0.58
FAM72D	0.58
ANP32A	0.58
MAPK1IP1L	0.58
ZBED4	0.58
CKAP2L	0.58
SCAF1	0.58
MAPKBP1	0.58
RFC5	0.58
CCT2	0.58
PTGES3	0.58
SETD5	0.58
H2AFZ	0.58
SEH1L	0.58
DUSP11	0.58
PPME1	0.58
CIZ1	0.58
PRR12	0.58
ECD	0.58
BTN2A1	0.58
TET3	0.58
ZNF182	0.58
WDR12	0.58
TMEM185B	0.58
NUCKS1	0.58
TFAM	0.58
RALGAPB	0.58
C4orf46	0.58
LSM14A	0.58
COPZ1	0.58
GZF1	0.58
LSM11	0.58
MSL2	0.58
C22orf30	0.58
PRPF38A	0.58
SEPT8	0.58
LLPH	0.58
FANCE	0.58
LOC645676	0.58
PRMT5	0.57
EPC2	0.57
TOP3B	0.57
EFTUD2	0.57
MOCS3	0.57
COPS8	0.57
KCTD7	0.57
TTC21B	0.57
DGKD	0.57
HNRNPUL2	0.57
DNMT3A	0.57
DMTF1	0.57
SPATA2	0.57
COBRA1	0.57
PFAS	0.57
ZCCHC11	0.57
ARCN1	0.57
TRAFD1	0.57
TP53BP1	0.57
PRPF38B	0.57
ADCY6	0.57
EIF4G2	0.57
ORC6L	0.57
ANAPC4	0.57
PTPN2	0.57
KIAA0753	0.57
CEP164	0.57
PPP4R1	0.57
URB2	0.57
CEP290	0.57
PRC1	0.57
SOCS5	0.57
RNMT	0.57
ZNF416	0.57
NUFIP2	0.57
GNAI3	0.57
UBE2I	0.57
KIF11	0.57
ZBTB45	0.57
RUVBL1	0.57
SF3B1	0.57
PPAT	0.57
HMGN1	0.57
SPPL3	0.57
WBP11	0.57
UBE2L3	0.57
BIRC2	0.57
PMS2L3	0.57
RBM45	0.57
HAX1	0.57
TAF15	0.57
GOLPH3L	0.57
ARHGEF2	0.57
ZNF410	0.57
LOC400657	0.57
C10orf88	0.57
NUP98	0.57
RNF220	0.57
CAD	0.57
MYST2	0.57
POLR2B	0.57
OFD1	0.57
C12orf48	0.57
MDC1	0.57
THUMPD3	0.57
ZNF585A	0.57
ZFYVE16	0.57
C2orf68	0.57
CCT6A	0.57
NEK2	0.57
TTF2	0.57
CHD6	0.57
ATG4B	0.57
RCC2	0.57
RNF2	0.57
ARPC5	0.57
CWF19L1	0.57
ZNF260	0.57
UVRAG	0.57
FBXO45	0.57
PPP1R12A	0.57
ENOPH1	0.57
ORC1L	0.57
C2orf43	0.57
RNF114	0.57
UBTF	0.57
RRP15	0.57
LOC441089	0.57
RC3H1	0.57
ZNF124	0.57
PKNOX1	0.57
ARPC2	0.57
RGPD4	0.57
RANBP2	0.57
GPSM2	0.57
CCNB1	0.57
CCDC97	0.57
SRP72	0.57
TSN	0.57
PARG	0.57
MKKS	0.57
RBM5	0.57
CDK2	0.57
BRD1	0.57
STIL	0.57
STRBP	0.57
IER3IP1	0.57
ZBTB5	0.57
NSD1	0.57
RAD54B	0.57
IQGAP3	0.57
GLMN	0.57
ESCO1	0.57
SETD2	0.57
ZBTB34	0.57
TBC1D22B	0.57
ZWILCH	0.57
FAM53C	0.57
CTCF	0.57
LAMC1	0.57
ZNF45	0.57
DNMT1	0.57
ABCC10	0.57
MED28	0.57
NOLC1	0.57
CCT5	0.57
CNP	0.57
STK17A	0.56
ZNF146	0.56
E2F4	0.56
C9orf30	0.56
PHF12	0.56
RPAP1	0.56
SEPT2	0.56
KIAA1586	0.56
JRKL	0.56
FANCD2	0.56
SMARCC2	0.56
BMPR1A	0.56
EFCAB7	0.56
MED10	0.56
LSG1	0.56
CCDC76	0.56
RQCD1	0.56
LEMD3	0.56
FAM136A	0.56
SP1	0.56
FAM116A	0.56
PUS7	0.56
DNTTIP1	0.56
C11orf46	0.56
WASF1	0.56
POLE3	0.56
ARID2	0.56
RNF216	0.56
SUZ12	0.56
HNRNPA1	0.56
SNRNP70	0.56
MYO19	0.56
CKAP2	0.56
B3GALNT2	0.56
NUSAP1	0.56
MELK	0.56
KIF23	0.56
HAUS1	0.56
FASTKD5	0.56
DGCR14	0.56
MIS12	0.56
CCNF	0.56
C20orf96	0.56
PASK	0.56
TRMT61B	0.56
SUPT5H	0.56
DBF4	0.56
DYRK2	0.56
ARIH2	0.56
YWHAB	0.56
MRPL3	0.56
KHSRP	0.56
CDCA8	0.56
KIAA1009	0.56
VEZT	0.56
APEX1	0.56
UTP18	0.56
PDE7A	0.56
DDX10	0.56
H2AFV	0.56
ZC3H4	0.56
S100PBP	0.56
C6orf134	0.56
LGTN	0.56
DOT1L	0.56
NCAPH	0.56
AAMP	0.56
EEF1E1	0.56
ZNF346	0.56
PAPSS1	0.56
KIF15	0.56
ALKBH8	0.56
SNRNP27	0.56
XPO5	0.56
HAUS2	0.56
VRK2	0.56
TYMS	0.56
CNOT2	0.56
MAGEF1	0.56
PTPN23	0.56
TCHP	0.56
LIN9	0.56
HEATR6	0.56
TCF20	0.56
PELP1	0.56
UBLCP1	0.56
PDRG1	0.56
VPS33B	0.56
DKC1	0.56
CREBZF	0.56
PRPF40A	0.56
TMEM9	0.56
DCP2	0.56
INCENP	0.56
NUP155	0.56
G2E3	0.56
EXOSC2	0.56
LEMD2	0.56
DIDO1	0.56
CDK4	0.56
GTSE1	0.56
CDCA5	0.56
KPNA4	0.56
UBE3B	0.56
ZDHHC13	0.56
DDX1	0.56
MFAP1	0.56
ZUFSP	0.56
DNAH14	0.56
PTPDC1	0.56
CENPH	0.56
BCOR	0.56
FAF2	0.56
PDCD10	0.56
GAPVD1	0.56
ZCCHC8	0.56
ZNF708	0.56
LRRC41	0.56
ZNF232	0.56
NDC80	0.56
CDK7	0.56
ZNF304	0.56
MTA2	0.56
TRIM65	0.56
PRPF4B	0.56
CGGBP1	0.56
PLK4	0.56
NOP56	0.56
CHD4	0.56
IKBKE	0.56
KIAA1267	0.56
C13orf23	0.56
HECTD2	0.56
FAM98B	0.56
CDC6	0.56
AP3B1	0.56
ASTE1	0.56
CHAF1A	0.56
C12orf65	0.56
C17orf80	0.56
BAT1	0.56
TFAP4	0.56
TRA2A	0.56
PURB	0.56
MRPL30	0.56
ZCCHC7	0.56
KIF2C	0.56
PRKRIR	0.56
PHF6	0.56
DCTN5	0.56
ELMO2	0.55
CENPQ	0.55
C11orf93	0.55
CENPJ	0.55
SEPHS1	0.55
RBMXL1	0.55
FAM20B	0.55
KDM2B	0.55
RPN2	0.55
RCN2	0.55
ATAD2B	0.55
C10orf84	0.55
CXXC1	0.55
KIAA1524	0.55
GGPS1	0.55
UNK	0.55
SLC26A11	0.55
CNOT10	0.55
WDFY1	0.55
SKA3	0.55
CAPZA1	0.55
SMU1	0.55
TMEM201	0.55
FAM48A	0.55
MAP4K4	0.55
FTSJ2	0.55
PIGX	0.55
PCGF3	0.55
KPNA2	0.55
ANKRD52	0.55
MARK2	0.55
DYNLL1	0.55
MSL3L2	0.55
HKR1	0.55
C19orf40	0.55
XRCC3	0.55
CSNK1D	0.55
RNF121	0.55
PDS5A	0.55
LRCH3	0.55
PARD3	0.55
TTK	0.55
NCAPG	0.55
TOP1	0.55
CHORDC1	0.55
EXOC3	0.55
NCOR2	0.55
LOC642852	0.55
HEATR5B	0.55
BCL7A	0.55
PGBD3	0.55
LIPT1	0.55
LOC100286793	0.55
AAAS	0.55
WDR70	0.55
UNC119B	0.55
DYNC1LI1	0.55
AKAP8	0.55
HARS2	0.55
ALMS1	0.55
FANCL	0.55
SFRS13A	0.55
EIF2S3	0.55
PARP2	0.55
RNF138	0.55
MTX3	0.55
NUP210	0.55
HELLS	0.55
ZNF613	0.55
E2F3	0.55
TAF5	0.55
TAB1	0.55
RBM26	0.55
IK	0.55
ZWINT	0.55
TMEM5	0.55
ZNF548	0.55
TSC1	0.55
TIMELESS	0.55
CCDC55	0.55
MRPL42	0.55
C1orf124	0.55
RAB3GAP1	0.55
C7orf26	0.55
TAF1B	0.55
PACRGL	0.55
SMN2	0.55
ZNF644	0.55
MED6	0.55
PRIM1	0.55
METTL9	0.55
ELF2	0.55
NUP54	0.55
DCLRE1C	0.55
EXOC6	0.55
FOXM1	0.55
SETDB1	0.55
PWP2	0.55
ZNF264	0.55
AHCTF1	0.55
WDR26	0.55
NIPA2	0.55
RPE	0.55
RNF31	0.55
FANCM	0.55
C15orf39	0.55
ACP1	0.55
NFU1	0.55
SETD4	0.55
MMS19	0.55
PSMA1	0.55
SRP68	0.55
SDHAP1	0.55
C16orf88	0.55
OSGEPL1	0.55
VPS8	0.55
AP3M1	0.55
NCAPD2	0.55
CDC16	0.55
RAD51L3	0.55
ZNF700	0.55
TOE1	0.55
PFDN2	0.55
GUSBL2	0.55
ZSCAN16	0.55
NGDN	0.55
ACVR2A	0.55
LIX1L	0.55
LRRC37B	0.55
UXS1	0.55
SF3B14	0.55
DCAF17	0.55
CDYL	0.55
TIA1	0.55
SPTLC1	0.55
KDM5C	0.55
RBM4	0.55
HAUS6	0.55
PAXIP1	0.55
PRPF6	0.55
BRD9	0.55
STK4	0.55
TRIM32	0.55
CAPN10	0.55
ING5	0.55
C17orf85	0.55
GCFC1	0.55
WDR82	0.55
SNX5	0.55
UBE2O	0.55
ZMYM4	0.55
INTS8	0.55
MASTL	0.55
MAPK9	0.55
PUS7L	0.55
NCKAP1	0.55
PRPF4	0.55
TIMM9	0.55
C13orf37	0.55
GNPDA2	0.55
ZNF256	0.55
MLLT10	0.55
UHRF1	0.55
ZNF131	0.55
RAD18	0.55
BRD8	0.55
C1orf131	0.55
FAM120AOS	0.55
FAM104A	0.55
GTF2A2	0.55
TRNT1	0.55
DLGAP5	0.55
RAD51AP1	0.55
ADAM17	0.55
CWC15	0.55
HEATR2	0.55
CASC3	0.55
CCDC123	0.55
CIR1	0.55
ZNF621	0.55
VEZF1	0.55
GIT1	0.55
ADSL	0.55
DR1	0.55
NT5C2	0.55
CUL2	0.55
ZNF383	0.55
TMEM216	0.54
DTNBP1	0.54
RNF4	0.54
C11orf73	0.54
ZNF350	0.54
GPATCH8	0.54
CDK16	0.54
INTS7	0.54
UCKL1	0.54
CDC45	0.54
STARD7	0.54
SENP5	0.54
MALT1	0.54
PIK3C3	0.54
FXR1	0.54
ZNF607	0.54
CDKN3	0.54
CDKAL1	0.54
PRR3	0.54
INO80D	0.54
LMAN2L	0.54
CALM2	0.54
ZNF271	0.54
TTLL5	0.54
RGPD6	0.54
L3MBTL	0.54
SOX13	0.54
METTL8	0.54
RSL24D1	0.54
PRPF19	0.54
PSMG2	0.54
SGOL1	0.54
TBP	0.54
MAP3K1	0.54
RNF26	0.54
CBL	0.54
WAPAL	0.54
RNF169	0.54
TUBD1	0.54
HSF2	0.54
C21orf59	0.54
SF3A3	0.54
C17orf53	0.54
WDR33	0.54
TAF11	0.54
NEURL4	0.54
ZNF550	0.54
PYCR2	0.54
ZNF675	0.54
CSNK2A1P	0.54
TCF12	0.54
LARP1	0.54
LRPPRC	0.54
DRG1	0.54
NAA35	0.54
HNRNPF	0.54
COPB1	0.54
SIX5	0.54
ZNF37B	0.54
TRIP12	0.54
VAMP4	0.54
GUSBP1	0.54
KCTD10	0.54
CCNK	0.54
ORMDL1	0.54
NAP1L1	0.54
PPIH	0.54
SYNCRIP	0.54
ZNF507	0.54
OTUB1	0.54
SNHG1	0.54
USP28	0.54
ARHGAP11A	0.54
JTB	0.54
FAM72B	0.54
USP24	0.54
GAR1	0.54
DENND5A	0.54
ESF1	0.54
NCBP1	0.54
C3orf19	0.54
FBXO18	0.54
BRCA1	0.54
CDK1	0.54
METTL5	0.54
SLMO2	0.54
CCDC14	0.54
ETV3	0.54
DPM1	0.54
PRDM10	0.54
STAMBP	0.54
C2orf60	0.54
DEK	0.54
KRBA1	0.54
TUBGCP3	0.54
SPATA5L1	0.54
ZCCHC4	0.54
ZNF669	0.54
C7orf70	0.54
MADD	0.54
C5orf34	0.54
U2AF1	0.54
CCDC142	0.54
DDX6	0.54
MRPS23	0.54
GTF3C4	0.54
ZNF326	0.54
ATG16L1	0.54
TMEM168	0.54
LRIG2	0.54
DARS	0.54
ACTR10	0.54
DCP1A	0.54
SON	0.54
PIP4K2B	0.54
TIPIN	0.54
NAA15	0.54
SPAST	0.54
VPS35	0.54
SSR1	0.54
CSNK1G1	0.54
ELAVL1	0.54
RBM25	0.54
FNBP1	0.54
CKAP4	0.54
FBXL12	0.54
C22orf46	0.54
PRUNE	0.54
ZNF792	0.54
CYTH2	0.54
ZKSCAN4	0.54
ATF4	0.54
MGA	0.54
PPIL2	0.54
STK35	0.54
C1orf35	0.54
EXOG	0.54
NCAPH2	0.54
ZNF446	0.54
THRAP3	0.54
C7orf44	0.54
USP14	0.54
TOR3A	0.54
CTDP1	0.54
C15orf44	0.54
ZDHHC17	0.54
CHML	0.54
PFDN1	0.54
KIF3A	0.54
ZNF496	0.54
RPAP2	0.54
TPD52L2	0.54
FBXW8	0.54
ZRANB2	0.54
XPR1	0.54
C11orf82	0.54
PALB2	0.54
TOP2A	0.54
SAPS1	0.54
NOTCH1	0.54
TRAF2	0.54
UMPS	0.54
LRRC42	0.54
CHST10	0.54
FOXJ3	0.54
NAE1	0.54
MEX3A	0.54
KIAA0226	0.54
AZI2	0.54
RUFY2	0.54
KATNA1	0.54
BAT2L1	0.54
XRRA1	0.54
NAP1L4	0.54
SFRS2IP	0.54
SHCBP1	0.54
PIGS	0.54
RCE1	0.54
PA2G4	0.54
PDCD11	0.54
C4orf14	0.54
ZNF845	0.54
SLC39A6	0.54
PDCL3	0.53
THOC7	0.53
MBD2	0.53
TDP1	0.53
SEPT7	0.53
ABL1	0.53
TMEM218	0.53
ZNF532	0.53
NOL7	0.53
HMGXB3	0.53
ANKZF1	0.53
NFKBIL2	0.53
ZNF230	0.53
CCDC137	0.53
TTC5	0.53
BTBD3	0.53
GLRX3	0.53
PATZ1	0.53
RARS	0.53
SMEK2	0.53
BCLAF1	0.53
GOLGA3	0.53
USP46	0.53
SF3A1	0.53
C19orf52	0.53
FAM175B	0.53
BFSP1	0.53
AFTPH	0.53
MED19	0.53
LRRC57	0.53
C15orf23	0.53
RNASEH1	0.53
DCK	0.53
TSSC1	0.53
MAPKAP1	0.53
GNG5	0.53
PPIG	0.53
TADA2A	0.53
FOXK1	0.53
RAP1B	0.53
DTL	0.53
RPF1	0.53
UTP11L	0.53
RPP30	0.53
TRAK2	0.53
ZNF544	0.53
MAGOH	0.53
WDR3	0.53
ATXN2L	0.53
CTDSPL2	0.53
DCAF12	0.53
ZBTB2	0.53
CSTF2T	0.53
SENP6	0.53
C3orf34	0.53
GART	0.53
H2AFX	0.53
ZNF354B	0.53
CIC	0.53
TCTN2	0.53
MARS	0.53
ZNF324B	0.53
SERBP1	0.53
VRK1	0.53
FNBP1L	0.53
ANLN	0.53
KLHL9	0.53
ZNF193	0.53
PRKDC	0.53
FASTKD2	0.53
POFUT2	0.53
SMAP1	0.53
CNTROB	0.53
DNAJC21	0.53
MEF2D	0.53
FAM178A	0.53
GABPB2	0.53
ZNF749	0.53
COG2	0.53
ZNF92	0.53
CD2AP	0.53
HAUS8	0.53
SMYD4	0.53
SMCR7L	0.53
HIF1AN	0.53
ZNF180	0.53
CCDC9	0.53
RFXAP	0.53
CETN3	0.53
EIF4A3	0.53
TM9SF4	0.53
CANT1	0.53
LY6G5B	0.53
C20orf43	0.53
RNF41	0.53
ZNF20	0.53
ZSCAN29	0.53
VPS11	0.53
SDCCAG1	0.53
PRR14	0.53
UBE2R2	0.53
ZNF773	0.53
PHF14	0.53
RNF219	0.53
CDC123	0.53
PRKAG1	0.53
SMAD5	0.53
FXC1	0.53
NUDT17	0.53
ZNF48	0.53
NASP	0.53
IP6K1	0.53
DLGAP4	0.53
ME2	0.53
RNASEH2B	0.53
RNF24	0.53
MAP3K7	0.53
NUDT21	0.53
SFRS17A	0.53
TRMT5	0.53
TAF5L	0.53
CENPO	0.53
EPRS	0.53
RAD51	0.53
RBBP5	0.53
MKL1	0.53
NARG2	0.53
SFRS14	0.53
LUC7L2	0.53
SOX9	0.53
TTC4	0.53
GMEB1	0.53
WDR73	0.53
MAEA	0.53
FTSJ3	0.53
C12orf26	0.53
SLC30A5	0.53
ANGEL2	0.53
RASAL2	0.53
YIPF5	0.53
CSRNP2	0.53
PNN	0.53
ZNF529	0.53
YWHAH	0.53
LOC100130932	0.53
ZNF354A	0.53
PAK1IP1	0.53
METAP1	0.53
ZBTB24	0.53
ZMYND19	0.53
RIOK2	0.53
PPM1D	0.53
EFNA4	0.53
CLP1	0.53
UBE2D1	0.53
PTPRA	0.53
UBTD2	0.53
KIAA0947	0.53
SNRNP40	0.53
SUMO1	0.52
DIMT1L	0.52
PPIL1	0.52
PMF1	0.52
ERCC8	0.52
ANKRD40	0.52
SPATS2L	0.52
C12orf11	0.52
RBM16	0.52
SCLT1	0.52
ABCC5	0.52
NONO	0.52
MED26	0.52
ZSWIM3	0.52
AP2A2	0.52
ZNF17	0.52
NSUN4	0.52
TBC1D12	0.52
STRADA	0.52
HUWE1	0.52
TMPO	0.52
GPKOW	0.52
ZMYM3	0.52
WDR47	0.52
GDAP2	0.52
ASB6	0.52
SDF2	0.52
C18orf25	0.52
CDC42SE2	0.52
MTMR3	0.52
CRKL	0.52
ZNF107	0.52
TGIF2	0.52
SMCHD1	0.52
SDHAF2	0.52
WDR77	0.52
POLA2	0.52
SDCCAG8	0.52
WDR43	0.52
KIF5B	0.52
CPSF7	0.52
C11orf30	0.52
MEN1	0.52
ANKRD16	0.52
SS18	0.52
LSM6	0.52
FTSJ1	0.52
MGAT4A	0.52
RAVER2	0.52
CRTC3	0.52
ZNF525	0.52
ZNHIT3	0.52
ZNF30	0.52
MED22	0.52
SEC22A	0.52
MSL1	0.52
ZBTB11	0.52
ATP6V0A2	0.52
LOC220729	0.52
SMURF2	0.52
APPL2	0.52
UPF3B	0.52
PIGU	0.52
ZNF225	0.52
ANKRD10	0.52
RBM33	0.52
KIFAP3	0.52
LOC388152	0.52
APAF1	0.52
ITGB3BP	0.52
GNL3L	0.52
IPO7	0.52
GPD2	0.52
MOGS	0.52
ASAP1	0.52
RANBP1	0.52
ZNF740	0.52
DNA2	0.52
MRPS9	0.52
CDC27	0.52
SRCAP	0.52
CENPE	0.52
TMED8	0.52
METTL2A	0.52
C1orf83	0.52
ST5	0.52
AKAP8L	0.52
FAM118B	0.52
C5orf22	0.52
STAM	0.52
BTRC	0.52
C11orf58	0.52
STARD3NL	0.52
CTBP1	0.52
METT10D	0.52
CHMP4B	0.52
NUP188	0.52
MBD6	0.52
PRPF18	0.52
TMEM131	0.52
SRF	0.52
DNAJC13	0.52
TDRKH	0.52
MCART1	0.52
PDCD6	0.52
C14orf93	0.52
CRAMP1L	0.52
MCPH1	0.52
ARL5A	0.52
THOC5	0.52
THAP11	0.52
C3orf33	0.52
BRP44	0.52
CCDC127	0.52
SEC24C	0.52
PSMD1	0.52
ZNF12	0.52
RTF1	0.52
YME1L1	0.52
TMEM69	0.52
C7orf28A	0.52
INPPL1	0.52
RAB3GAP2	0.52
POP1	0.52
ZNF606	0.52
FIZ1	0.52
USP36	0.52
PBX2	0.52
TOMM20	0.52
C17orf63	0.52
MFAP3	0.52
NEK7	0.52
LOC646762	0.52
ZNF140	0.52
ZNF302	0.52
KLHL22	0.52
ZNF273	0.52
WDR41	0.52
MFSD5	0.52
ZNF33A	0.52
VHL	0.52
ZNF646	0.52
PPP1R15B	0.52
FOXK2	0.52
AP3M2	0.52
PLEKHA9	0.52
COG1	0.52
ZNF552	0.52
ZNF227	0.52
NFYA	0.52
RBBP6	0.52
TFE3	0.52
XRCC1	0.52
SP4	0.52
DEPDC1	0.52
C14orf119	0.52
ARFGAP1	0.52
ELP4	0.52
GPR107	0.52
C9orf6	0.52
RIF1	0.52
AATF	0.52
KRI1	0.52
EXOSC8	0.52
TRIP13	0.52
ZMYM1	0.52
DDX12	0.52
OTUD7B	0.52
ZNF28	0.52
ZNF37A	0.52
TASP1	0.52
BOD1	0.52
C10orf28	0.52
EIF5B	0.52
THOC4	0.52
ZNF589	0.52
C3orf26	0.52
UBE2MP1	0.52
C20orf20	0.52
CNOT8	0.52
TAF7	0.52
TUBA1B	0.52
SRGAP2	0.52
CLASP2	0.52
ZNF761	0.52
RANBP3	0.52
JARID2	0.52
AAGAB	0.52
ZNF100	0.52
LOC728190	0.52
PNMA1	0.51
USP42	0.51
SEC23IP	0.51
UPF3A	0.51
SGSM3	0.51
CRLF3	0.51
TSEN54	0.51
RFT1	0.51
ANKRD36	0.51
RNF111	0.51
NAB1	0.51
RGPD3	0.51
UPF2	0.51
BRD3	0.51
NUP93	0.51
PPT1	0.51
FBXL19	0.51
PTPN1	0.51
B3GALNT1	0.51
GTF2F1	0.51
FIGNL1	0.51
KRR1	0.51
ETAA1	0.51
BCDIN3D	0.51
STX16	0.51
AP4E1	0.51
APPL1	0.51
RHOT1	0.51
DNAJC5	0.51
ZNF24	0.51
GRWD1	0.51
C7orf49	0.51
PHOSPHO2	0.51
GEMIN4	0.51
CCT7	0.51
LSM14B	0.51
ADIPOR1	0.51
ZNF628	0.51
INO80	0.51
ACTG1	0.51
RBM28	0.51
RFC3	0.51
ZC3H7A	0.51
NUP153	0.51
PLCB3	0.51
CHST14	0.51
CXXC5	0.51
C12orf43	0.51
C22orf29	0.51
ABI1	0.51
C5orf44	0.51
SUPT6H	0.51
ATF6B	0.51
ZNF623	0.51
COPS4	0.51
PA2G4P4	0.51
EXOC2	0.51
C2orf34	0.51
FBF1	0.51
KAT5	0.51
ABCA11P	0.51
CDAN1	0.51
TGS1	0.51
LRRC1	0.51
PAK4	0.51
ACTR2	0.51
RECQL	0.51
TAGLN2	0.51
TSGA14	0.51
ATP11A	0.51
RNF144A	0.51
NAA50	0.51
UTP23	0.51
SRP19	0.51
ZNF777	0.51
ZNF587	0.51
CDV3	0.51
SUDS3	0.51
CBX5	0.51
C18orf10	0.51
FGD6	0.51
TRIM33	0.51
ZNF718	0.51
KDELC1	0.51
NHP2L1	0.51
KIAA1967	0.51
WDR48	0.51
BCL10	0.51
ZNF440	0.51
ZNF836	0.51
ZNF527	0.51
C17orf75	0.51
EPC1	0.51
TROAP	0.51
C14orf135	0.51
FAM103A1	0.51
ZKSCAN5	0.51
KIAA1468	0.51
NUP43	0.51
USP3	0.51
ATP5G2	0.51
CCDC41	0.51
SNX6	0.51
EIF4E2	0.51
NCK2	0.51
ZNF480	0.51
PSRC1	0.51
C17orf86	0.51
CSNK1E	0.51
MBTD1	0.51
USP33	0.51
SLC26A2	0.51
CDC42EP4	0.51
SMARCAD1	0.51
TMEM206	0.51
TRMT2A	0.51
ZNF485	0.51
C14orf109	0.51
ZNF764	0.51
NGRN	0.51
PHC3	0.51
ATN1	0.51
SEPT9	0.51
IVNS1ABP	0.51
C6orf153	0.51
DPAGT1	0.51
WDR20	0.51
ZNF805	0.51
ALG6	0.51
TRAPPC2	0.51
CASP8AP2	0.51
RPL32P3	0.51
COPS3	0.51
DDX59	0.51
GOSR2	0.51
RAB1A	0.51
RSL1D1	0.51
SF3B3	0.51
ZNF235	0.51
NKIRAS2	0.51
IFT80	0.51
BLM	0.51
LOC651250	0.51
ERLEC1	0.51
ARHGAP19	0.51
ETF1	0.51
OGT	0.51
SFRS15	0.51
SLC36A1	0.51
XPNPEP1	0.51
RAD17	0.51
YLPM1	0.51
DYRK1A	0.51
RAD21	0.51
C7orf28B	0.51
UBR7	0.51
POLR3B	0.51
DGUOK	0.51
SUPT4H1	0.51
ATR	0.51
CEP72	0.51
PIF1	0.51
ZBTB40	0.51
CDC25A	0.51
TPP2	0.51
ALKBH1	0.51
KIAA1797	0.51
RABGAP1	0.51
LENG8	0.51
WDR35	0.51
RELA	0.51
MTERFD2	0.51
TBC1D25	0.51
SKA2	0.51
BAK1	0.51
ZNF605	0.51
ITFG2	0.51
MARK3	0.51
NR2C2	0.51
ZXDC	0.51
ASB1	0.51
ARGLU1	0.51
FAM200A	0.51
STK36	0.51
SPOP	0.51
SETD1A	0.51
TMEM81	0.51
FLVCR1	0.51
CASP8	0.51
NRAS	0.51
VAPA	0.51
SUB1	0.51
NCAPG2	0.51
SIPA1L3	0.51
SIN3A	0.51
C6orf64	0.51
RALA	0.51
ZNF828	0.51
PCIF1	0.51
ZDHHC6	0.5
GRB2	0.5
RICTOR	0.5
C19orf55	0.5
[truncated: 4,813 more rows]
