# Supplementary material for: DUSP12 regulates the tumorigenesis and prognosis of hepatocellular carcinoma
Source: PeerJ. 2021 Aug 3;9:e11929. doi: 10.7717/peerj.11929 (PMC8344690; doi:10.7717/peerj.11929)
Supplement: Supplemental Information 4 — The top negatively correlated genes in TCGA dataset for DUSP12 (Pearson correlation coefficient < = −0.3). [file peerj-09-11929-s004.xls]

## Sheet: Table S2
Genes	PearsonCC
HP	-0.45
APOC1	-0.44
RBP4	-0.43
C8A	-0.41
HMGCL	-0.4
MASP2	-0.39
ACSM2A	-0.39
LDHD	-0.39
HPX	-0.38
SLC27A5	-0.38
SLC22A3	-0.38
HPR	-0.37
ACY1	-0.37
ASPDH	-0.37
ABHD14B	-0.36
HRSP12	-0.36
ITIH4	-0.36
PON1	-0.36
C10orf125	-0.35
C6	-0.35
SAA4	-0.34
GLYATL1	-0.34
ACSM2B	-0.34
APOC3	-0.34
PEX11G	-0.34
DCXR	-0.34
F9	-0.34
ITIH1	-0.34
CIDEB	-0.33
LEAP2	-0.33
A1BG	-0.33
PC	-0.33
SERPING1	-0.33
TTC36	-0.33
GSTZ1	-0.33
AZGP1	-0.33
GLYAT	-0.33
FGA	-0.32
TMEM176B	-0.32
TST	-0.32
C14orf68	-0.31
FTCD	-0.31
CA5A	-0.31
CYP4A11	-0.31
CYP8B1	-0.31
DHRS3	-0.31
HYAL1	-0.31
ACAA1	-0.31
HAO1	-0.31
DEPDC7	-0.3
MACROD1	-0.3
APOF	-0.3
HSD17B6	-0.3
PROZ	-0.3
ALDH4A1	-0.3
CYP2C8	-0.3
ADH4	-0.3
PINK1	-0.3
CCL14	-0.3
LCAT	-0.3
GPD1	-0.3
AKR7A3	-0.3
DHODH	-0.3
