# Supplementary material for: DUSP12 regulates the tumorigenesis and prognosis of hepatocellular carcinoma
Source: PeerJ. 2021 Aug 3;9:e11929. doi: 10.7717/peerj.11929 (PMC8344690; doi:10.7717/peerj.11929)
Supplement: Supplemental Information 5 [file peerj-09-11929-s005.xlsx]

## Sheet: OD450 Value
	0h	24h	36h	48h	72h
NC	0.266	0.672	0.945	1.399	1.572
	0.276	0.683	1.064	1.439	1.571
	0.273	0.682	1.078	1.442	1.571
shDUSP12-1	0.267	0.551	0.785	1.127	1.092
	0.266	0.538	0.832	1.082	1.095
	0.281	0.524	0.702	1.055	1.091
shDUSP12-2	0.27	0.551	0.709	1.027	1.09
	0.28	0.526	0.715	1.089	1.093
	0.273	0.531	0.799	0.968	1.088
