# Supplementary material for: DUSP12 regulates the tumorigenesis and prognosis of hepatocellular carcinoma
Source: PeerJ. 2021 Aug 3;9:e11929. doi: 10.7717/peerj.11929 (PMC8344690; doi:10.7717/peerj.11929)
Supplement: Supplemental Information 8 [file peerj-09-11929-s008.xlsx]

## Sheet: Cells Count by software ImageJ
	Cell Counts (ImageJ)
NC	1647	1558	1590
siDUSP12-1	641	585	662
siDUSP12-2	432	402	438
